# Supplementary material for: Templating silica network construction using 3,5-dihydroxybenzylalcohol based dendrimers: influence of dendrimer aggregation on evolving network structure
Source: Royal Society of Chemistry journal article supplement (doi:10.1039/b617864b), 2007-01-01

**Supplementary Material:**

**Templating Silica Network Construction Using  
3,5-Dihydroxybenzylalcohol Based Dendrimers: Influence of  
Dendrimer Aggregation on Evolving Network Structure**

**Alex Adam Czerniewski, Xiao Jun Liu, Olivier Rolland, Rami Hourani,  
Mickael Four and Ashok Kakkar\***

Department of Chemistry, McGill University, 801 Sherbrooke Street West, Montreal, Quebec H3A 2K6, Canada.

**Figure 1:** Solid-state  $^{29}\text{Si}$ -NMR spectrum of the G0 templated network.

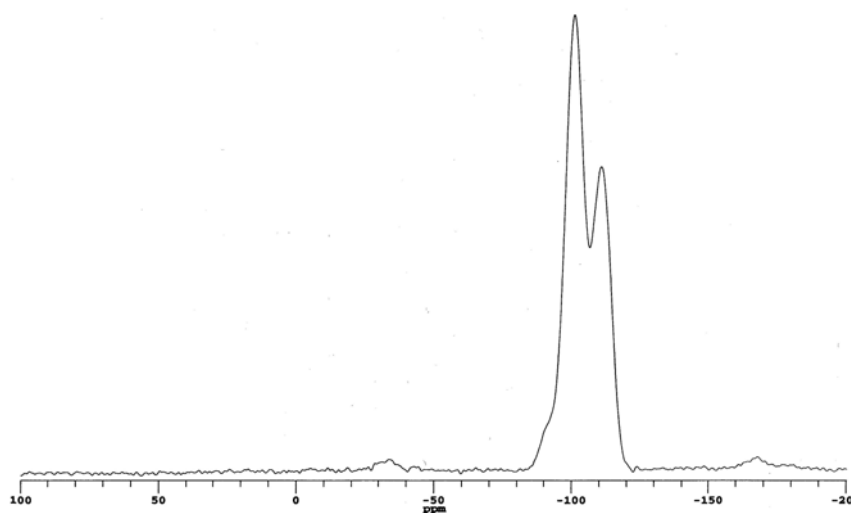

**Figure 2:** Solid state  $^{13}\text{C}\{^1\text{H}\}$ -NMR spectra of the G-5 templated network before and after dendrimer removal.

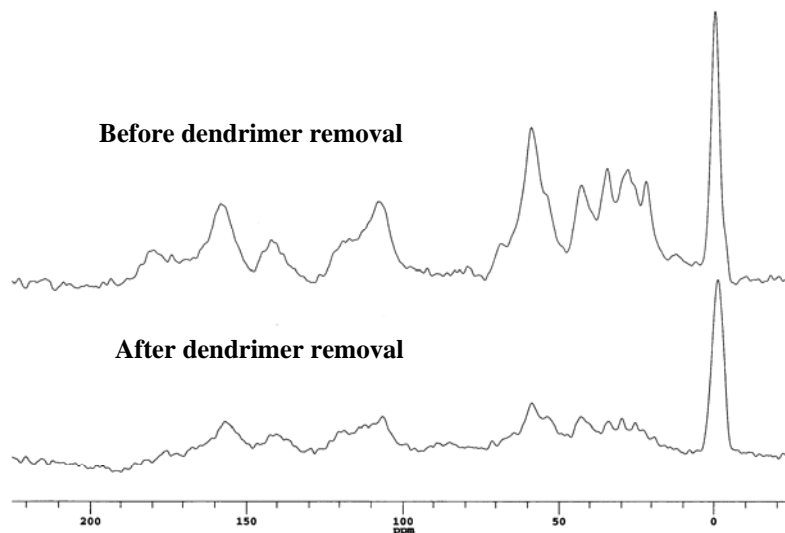

**Figure 3:**  $^1\text{H}$  NMR of 3,5-dihydroxybenzylalcohol (DHBA) in deuterated-DMSO before reacting with  $\text{Si}(\text{NMe}_2)_4$  (bottom). The OH groups appear at 9.068 (phenolic OH, singlet) and 4.992 (benzylic OH, triplet) ppm. Upon reacting with  $\text{Si}(\text{NMe}_2)_4$  the latter peaks disappear. The benzylic  $\text{CH}_2$  that appeared as a doublet due to coupling with OH now appears as a singlet at 4.294.

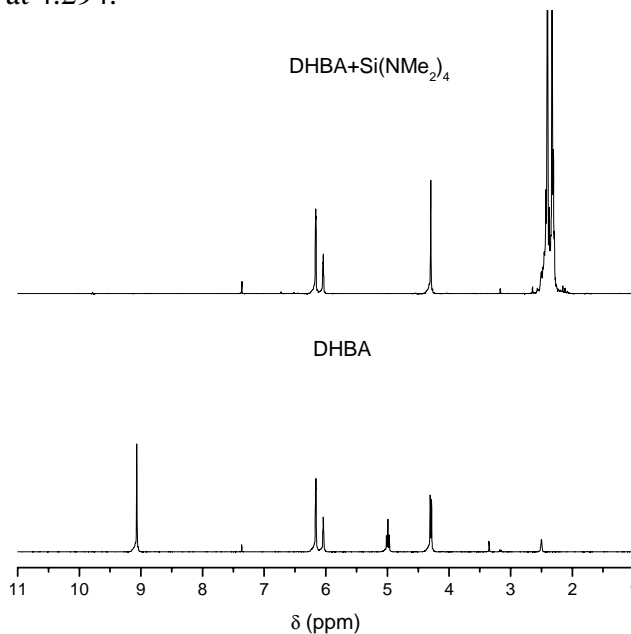

Figure 4: Photographic images of G1 templated silica network (after dendrimer removal) placed in water (a) and THF (b).

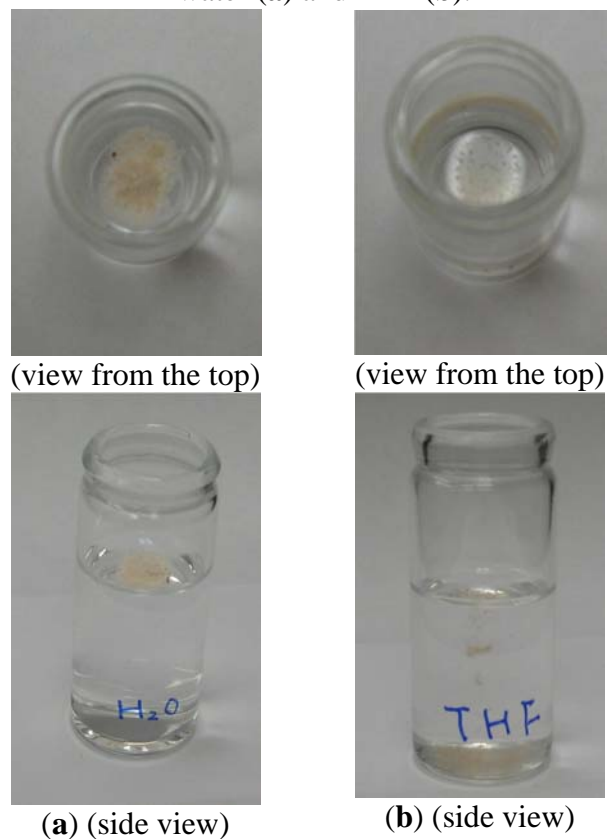

Figure 5: Photographic image of G3 templated network before (left, white in color) and after DR1 encapsulation (right, red in color).

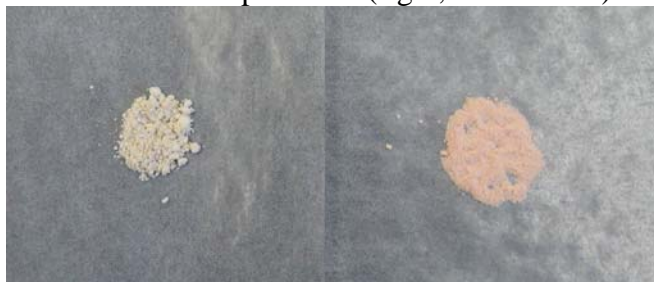

Supplement: b617864b.pdf [file b617864b.pdf]
